# Supplementary material
Source: PubMed Central journal article supplement (PMC4596680)
Supplement: 10.1534_115.177329_genetics.115.177329-4.pdf [file 10.1534_115.177329_genetics.115.177329-4.pdf]

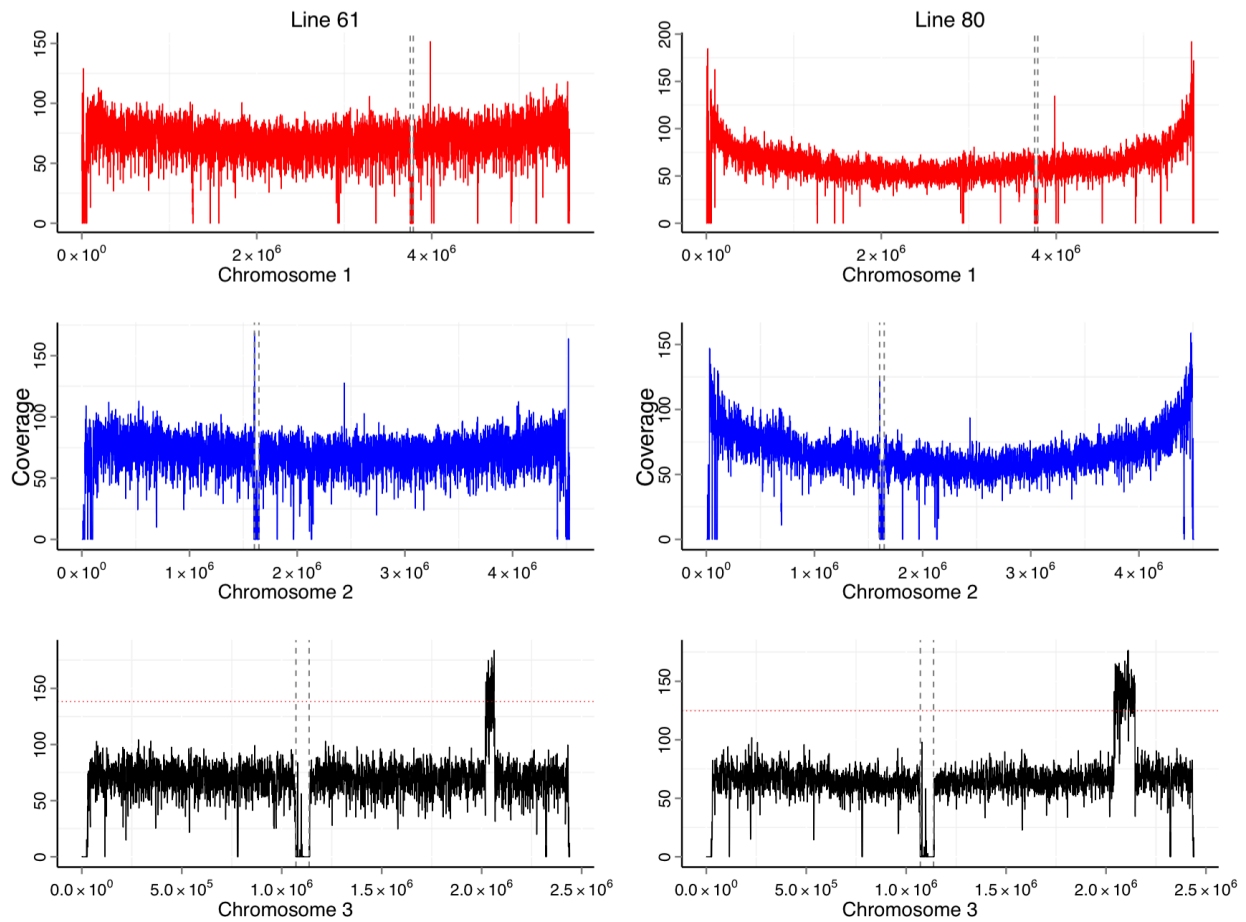

**Fig. S3. Average read coverage in 1kb windows across MA line 61 and 80.** Two duplications are clearly visible on chromosome 3 as regions of elevated coverage (dotted red lines represent 2 times the chromosomal median coverage). The start and end of both duplications occur within large repeat elements. Many other short regions of high or low coverage were observed but were common to most or all lines. Centromeric regions are indicated by grey dotted lines.
