# Supplementary material
Source: PubMed Central journal article supplement (PMC4596680)
Supplement: 10.1534_115.177329_genetics.115.177329-5.pdf [file 10.1534_115.177329_genetics.115.177329-5.pdf]

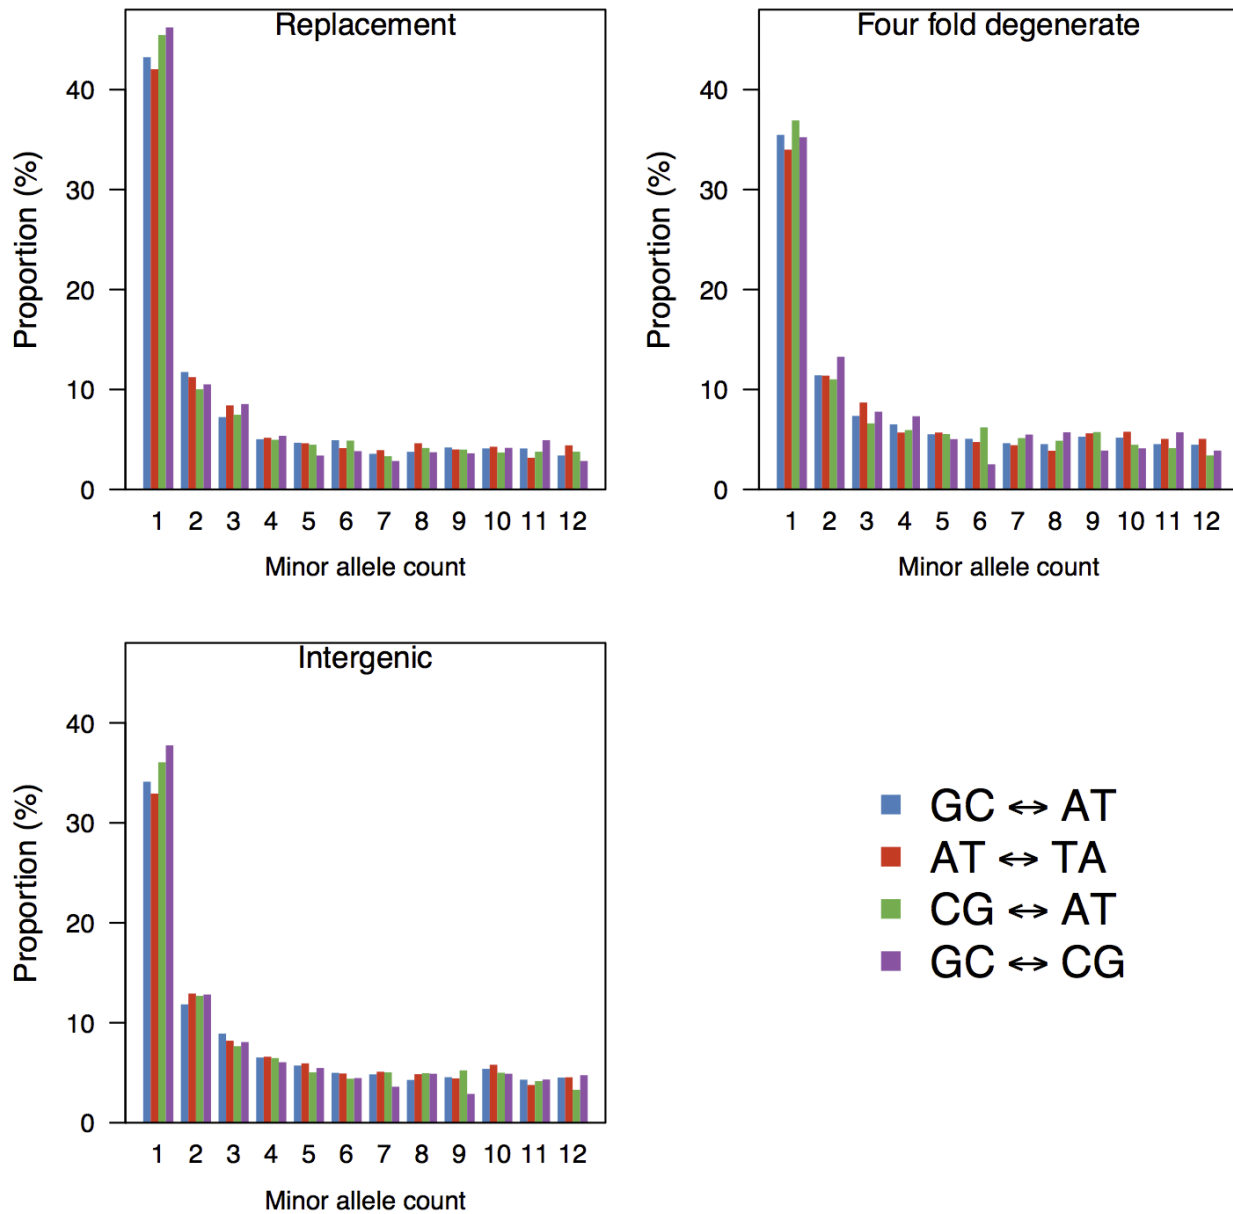

**Fig. S2.** The minor allele count (out of 25 lines) for SNPs in each substitution class at replacement, four fold and intergenic sites.
