# Supplementary material
Source: PubMed Central journal article supplement (PMC4596680)
Supplement: 10.1534_115.177329_genetics.115.177329-8.pdf [file 10.1534_115.177329_genetics.115.177329-8.pdf]

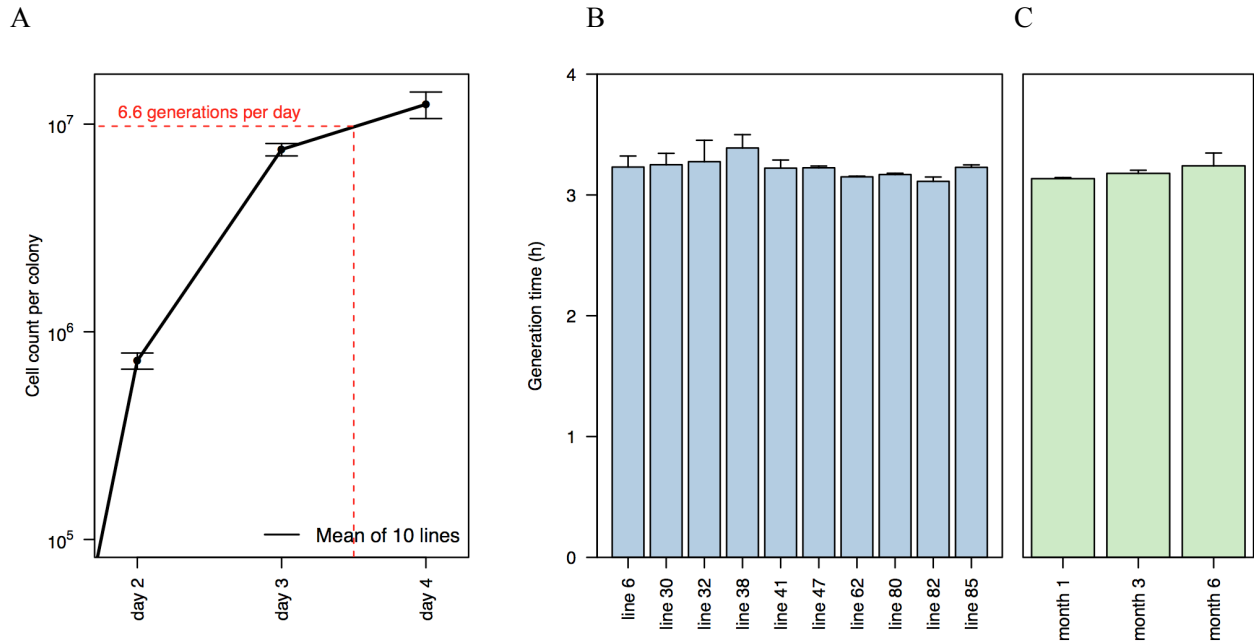

**Fig. S1. Generation time estimates of MA lines on YES media plates at 32°C.** **A.** Cell count estimates on day 2, 3 and 4 post-streaking from 10/96 random MA lines. On average, there was  $23.2 \pm 0.22$  (SD) generations per 3.5 days cycle. **B.** Generation time estimate (from day 3 cell count) for 10 random MA lines. **C.** Average day 3 generation time for 10 lines after 1, 3 and 6 months of MA. Error bars are SE.
